# Supplementary material for: Automatic Pretreatment of Dispersive Liquid Liquid Microextraction Based on Immunomagnetic Beads Coupled with UPLC-FLD for the Determination of Zearalenone in Corn Oils
Source: MDPI journal article supplement (doi:10.3390/toxins15050337), 2023-05-15
Supplement: s1 [file s1]

**Table S1.** Comparison of the proposed IMBs-DLLME pretreatment method and the traditional IAC pretreatment method.

| Process    | Vortex                                     | Centrifugation | Clean-Up          | Dilution | Nitrogen evaporation | Total          |
|------------|--------------------------------------------|----------------|-------------------|----------|----------------------|----------------|
| IAC        | 20 min <sup>a</sup><br>/10 mL <sup>b</sup> | 5 min          | 42 min<br>/2 mL   | no need  | 60 min               | 127 min /12 mL |
| IMBs-DLLME | no need                                    | no need        | 43 min<br>/0.5 mL | 2 min    | no need              | 45 min /0.5 mL |

<sup>a</sup> The time consumed in this process. <sup>b</sup> The organic reagents consumed in this process.

**Table S2.** Detection results of real samples.

| Sample | IAC (µg/kg) | IMBs-DLLME (µg/kg) |
|--------|-------------|--------------------|
| #1     | 84.1        | 91.5               |
| #2     | 195.6       | 198.2              |
| #3     | 197.7       | 200.1              |
| #4     | 197.3       | 203.1              |
| #5     | 191.3       | 186.3              |
| #6     | 103.7       | 111.8              |
| #7     | 61.5        | 67.1               |
